# Supplementary material
Source: Springer Nature journal article supplement (https://www.springermedizin.de/resource/supplementary/12906_2010_307_MOESM1_ESM.pdf/9519386)
Supplement: MOESM1 [file 9519386]

**Ethanol ext.**

**Ethanol ext.**

silica gel column chromatography  
which was eluted gradually  
with  $\text{CHCl}_3$  and Methanol. 8 : 2→6 : 4→5 : 5

LH-20 column  
chromatography  
which was eluted  
Methanol.

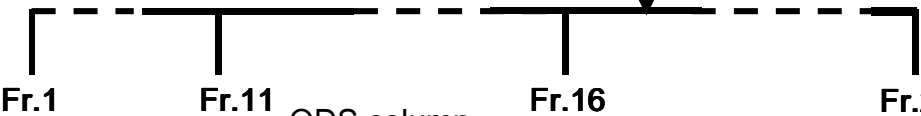

ODS column  
chromatography  
which was eluted  
gradually with  
1%AcOH/ $\text{H}_2\text{O}$   
and Methanol.

silica gel column  
chromatography  
which was eluted  
gradually with  
 $\text{CHCl}_3$  and Methanol

**Compound A**

**Compound B**

Fr.1

Fr.4

Fr.1.2

Fr.3 4

Fr.5.6

Fr.10

**Compound C**

**Compound E**

**Compound D**
